# Supplementary material for: First example of Ugi's amine as a platform for the construction of chiral coordination polymers: synthesis and properties
Source: Royal Society of Chemistry journal article supplement (doi:10.1039/d0nj04783j), 2020-12-10
Supplement: d0nj04783j1.pdf [file d0nj04783j1.pdf]

## Supporting Information for

### First Example of Ugi's Amine as a Platform for Construction of Chiral Coordination Polymers: Synthesis and Properties

Leisan Gilmanova<sup>a,b</sup>, Ruslan Shekurov<sup>a</sup>, Mikhail Khrizanforov<sup>†a</sup>, Kamil Ivshin<sup>a</sup>, Olga Kataeva<sup>a</sup>, Volodymyr Bon<sup>b</sup>, Irena Senkovska<sup>b</sup>, Stefan Kaskel<sup>b</sup>, Vasily Miluykov,<sup>a</sup> Yulia Budnikova<sup>a</sup>

<sup>a</sup> *Arbuzov Institute of Organic and Physical Chemistry, FRC Kazan Scientific Center of RAS, Arbuzov Str. 8, 420088 Kazan, Russia*

<sup>b</sup> *Chair of Inorganic Chemistry I, Technische Universität Dresden, Bergstr. 66, 01062 Dresden, Germany*

† Corresponding authors: khrizanforov@gmail.com

#### Experimental section

**General Considerations.** All manipulations were carried out using standard Schlenk techniques under an atmosphere of dry argon. Anhydrous diethyl ether was obtained from commercial sources and used as supplied. <sup>1</sup>H (400.13 MHz), <sup>13</sup>C (100.16 MHz), and <sup>31</sup>P (500 MHz) NMR spectra were recorded on a Bruker Avance DRX 400 spectrometer at 20 °C in CDCl<sub>3</sub> and referenced to tetramethylsilane (TMS). Powder X-ray diffraction (PXRD) experiments were carried out at room temperature using STOE STADI P diffractometer with Cu-Kα1 radiation (λ = 1.54059 Å) and a 2D detector (Mythen, Dectris) in transmission geometry. The thermal stabilities were investigated by thermogravimetry (TG) analysis using NETZSCH (Selb, Germany) STA409 instrument. Approximately 5–6 mg of sample was placed into an Al<sub>2</sub>O<sub>3</sub> crucible with a pre-hole on the lid and heated from 25 °C to 1000 °C (heating rate of 5 °C/min, under Ar atmosphere). SEM analysis was carried out using 2 kV acceleration voltage and a working distance of 21.7 mm on a Hitachi SU8020. FT-IR spectra were recorded on a Bruker Vertex 70 in the range from 4000 to 600 cm<sup>-1</sup> (resolution 2 cm<sup>-1</sup>, ATR). CHN analysis was performed on a EuroEA elemental Analyser.

**R,Sp/S,Rp-2-(N,Ndimethyl-α-aminoethyl)ferrocenylphosphinic acid (1) synthesis.** To a solution of N,N-dimethyl-1-ferrocenylethylamine (5 g, 19.45 mmol) in diethyl ether at RT was slowly added <sup>n</sup>BuLi (7.8 ml, 21.4 mmol, 2.5M in *n*-hexane). The resulting solution was stirred for 8 h. Then it was cooled down on *i*-pr/N<sub>2</sub> bath and bis(N,N-diethylamino)chlorophosphine (4.1 ml, 21.4 mmol) was added dropwise. Cold bath was removed in 30 min and reaction continued for more 6 h. Afterwards Et<sub>2</sub>O was evaporated, brown oily residue was dissolved in chloroform and hydrolyzed with 4 equivalents of 30% acetic acid. Reaction mixture was refluxed for 5 h. Brown oily residue was washed thoroughly with Et<sub>2</sub>O and recrystallized from acetone giving a yellow powder. Yield: 3 g (48%). <sup>1</sup>H NMR: δ = 1.56 (d, 3H, 3JHH = 6.27, CH<sub>3</sub>), 2.50 (s, v br, 6H, NMe<sub>2</sub>), 4.26 (s, 5H, Cp), 4.29 (s, 1H, Cp), 4.37 (s, 1H, Cp), 4.66 (qv, 1H, 3JHH = 6.27, CH), 4.78 (s, 1H, Cp) 8.00 (d, <sup>1</sup>J<sub>HP</sub> = 540, P-H). <sup>13</sup>C{<sup>1</sup>H} NMR: δ = 70.34 (s), 76.61 (s), 77.04 (s), 77.46 (s). <sup>31</sup>P{<sup>1</sup>H} NMR: δ = 14.8 (s, 1P, <sup>1</sup>J<sub>HP</sub> = 549). FT-IR: 2300 cm<sup>-1</sup> (P-H stretch), 1644 cm<sup>-1</sup> (P-OH stretch), 1178 cm<sup>-1</sup> (P=O stretch), 1110-914 cm<sup>-1</sup> (P-Ar stretch and Cp-ring groups). EA: calcd.: C 49.58 %, H 6.54 %, N 4.13 %, P 9.13 %, found: C 48.99 %, H 6.84%, N 3.44%, P 8.79%.

Synthesis of **2**: Ni(NO<sub>3</sub>)<sub>2</sub>·6H<sub>2</sub>O (0.0136 g, 0.046 mmol), acid **1** (0.03 g, 0.092 mmol), and 4,4'-bipyridine (0.0146 g, 0.092 mmol) were dissolved in water (2 ml). The mixture was heated to 90 °C for 24 h in a Pyrex tube. After cooling to room temperature the product was isolated by decanting the mother liquid and washed with water. Yield: 49%.

The phase purity of the product was confirmed by X-ray powder diffraction analysis (Fig. S1), TG and SEM/EDS analysis. FT-IR: 2300 cm<sup>-1</sup> (P-H stretch), 1604 cm<sup>-1</sup> (P-OH stretch), 1165 cm<sup>-1</sup> (P=O stretch), 1096-

941 cm<sup>-1</sup> (P-Ar stretch and Cp-ring groups), EA for [Ni(bpy)<sub>2</sub>L<sub>2</sub>·7H<sub>2</sub>O]<sub>n</sub>: calcd.: C 50.69 %, H 6.03 %, N 7.39 %, P 5.45 %, found: C 52.78 %, H 5.65 %, N 5.09 %, P 4.90 %.

### Single crystal X-ray diffraction

The X-ray diffraction data for the single crystal of **1** was collected on a Bruker AXS Smart Apex diffractometer at 296(2) K using Mo K $\alpha$  radiation ( $\lambda = 0.71073$  Å). The structure was solved by direct methods using APEX3<sup>1</sup> for data collection, SAINT<sup>2</sup> for data reduction, SADABS<sup>3</sup> for multi-scan absorption correction, SHELXT<sup>4</sup> for structure solution, SHELXL<sup>4</sup> for structure refinement by full-matrix least-squares against  $F^2$ . All non-hydrogen atoms were refined anisotropically. Hydrogen atoms at carbon atoms were placed into calculated positions and refined as “riding” atoms. Hydrogen atoms of the water molecule were revealed from difference Fourier series and refined isotropically. CCDC 1996849 contains the supplementary crystallographic data for this paper.

Crystal data for **1**: formula C<sub>14</sub>H<sub>22</sub>FeNO<sub>3</sub>P,  $M = 339.14$  g/mol, monoclinic, space group P2<sub>1</sub>/c (No. 14),  $Z = 4$ ,  $a = 16.210(8)$  Å,  $b = 7.525(4)$  Å,  $c = 12.606(6)$  Å,  $\beta = 97.855(6)^\circ$ ,  $V = 1523.3(13)$  Å<sup>3</sup>,  $\rho_{\text{calc}} = 1.479$  g·cm<sup>-3</sup>,  $\mu = 1.101$  mm<sup>-1</sup>, 13163 reflections collected ( $-21 \leq h \leq 21$ ,  $-10 \leq k \leq 9$ ,  $-16 \leq l \leq 16$ ),  $\theta$  range = 2.537° to 28.325°, 3732 independent ( $R_{\text{int}} = 0.0922$ ) and 1762 observed reflections [ $I \geq 2 \sigma(I)$ ], 200 refined parameters,  $R_1 = 0.0584$ ,  $wR_2 = 0.1418$ , max (min) residual electron density 0.745 (−0.472) e Å<sup>-3</sup>.

**Table S1.** Details of hydrogen bonds in **1**.

| D–H···A        | D–H, Å    | H···A, Å  | D···A, Å | angle D–H···A |
|----------------|-----------|-----------|----------|---------------|
| N13–H13···O2   | 0.92(5)   | 1.76(5)   | 2.665(5) | 166(4)        |
| O1W–H1WB···O2  | 0.85(1)   | 1.97(3)   | 2.777(6) | 159(6)        |
| O1W–H1WA···O1* | 0.878(10) | 1.975(17) | 2.811(5) | 169(7)        |

O1\* is at equivalent position (1− $x$ , −1− $y$ , 1− $z$ )

The dataset on single crystal of **2** was collected on Bruker Kappa APEX2 diffractometer, equipped with a 4-circle goniometer, long-focus X-ray tube with Mo-anode and graphite monochromator ( $\lambda = 0.071073$  nm). The dataset was collected at 296 K. The images were integrated using the SAINT routine.<sup>5-8</sup> The corrections for Lorentz, polarization and absorption effects were performed with the help of SADABS software.<sup>5-8</sup> The crystal structure was solved by direct methods and refined by full matrix least-squares on  $F^2$  using SHELXT-2014/5 and SHELXL-2018/3.<sup>4</sup> All non-hydrogen atoms were refined in the anisotropic approximation. Hydrogen atoms were refined in geometrically calculated positions using a “riding model” with  $U_{\text{iso}}(H) = 1.2U_{\text{iso}}(C)$ . The occupancies of disordered P1 and Fe1 were refined freely and fixed in the last refinement cycle. CCDC-2021806 contain the supplementary crystallographic data for **2**. These data can be obtained free of charge from the Cambridge Crystallographic Data Centre via [www.ccdc.cam.ac.uk/data\\_request/cif](http://www.ccdc.cam.ac.uk/data_request/cif).

Crystal data for [Ni(bpy)<sub>2</sub>L<sub>2</sub>·7H<sub>2</sub>O]<sub>n</sub>·(**2**): C<sub>48</sub>H<sub>54</sub>Fe<sub>2</sub>N<sub>6</sub>NiO<sub>4</sub>P<sub>2</sub>·7H<sub>2</sub>O,  $M = 1137.32$  g mol<sup>-1</sup>, tetragonal,  $I4/mmm$  (No. 139),  $a = 11.3027(7)$  Å,  $c = 17.8993(13)$  Å,  $V = 2286.7(3)$  Å<sup>3</sup>,  $Z = 2$ ,  $d_c = 1.469$  gcm<sup>-3</sup>,  $\mu = 1.155$  mm<sup>-1</sup>,  $2\theta$  range 2.131 - 26.40°, reflections collected/unique 26.400/711,  $R_{\text{int}} = 0.0585$ , reflections/parameter 711/44,  $R_1(I/I(\sigma) > 2) = 0.1200$ ,  $wR_2(\text{all data}) = 0.3158$ ,  $S = 1.537$ , largest diff. peak 1.060 eÅ<sup>-3</sup> and hole - 0.349 eÅ<sup>-3</sup>.

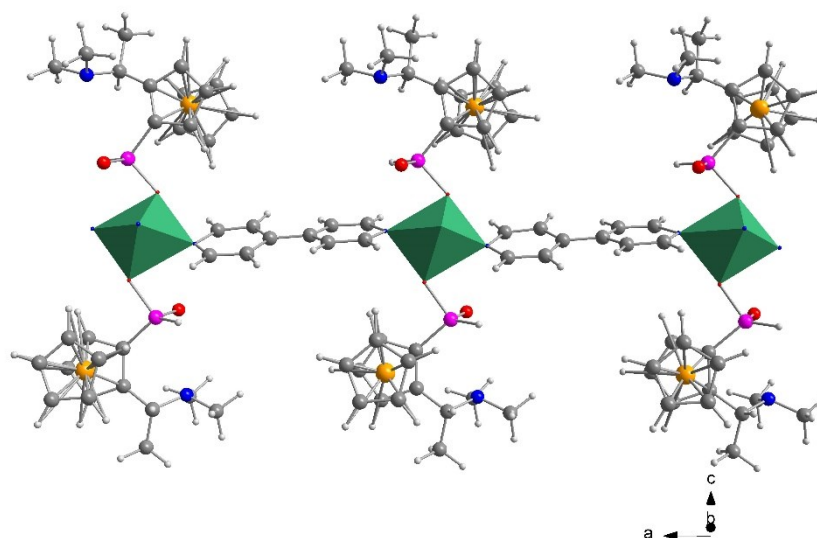

**Figure S1.** Simulated crystal structure of **2** in *P1*: view on Ni(bpy)<sub>2</sub>L<sub>2</sub> layers along *b* crystallographic direction. Color code: C - grey, N - blue, O - red, P - pink, Fe - orange, Ni polyhedra - green. **Powder X-ray diffraction**

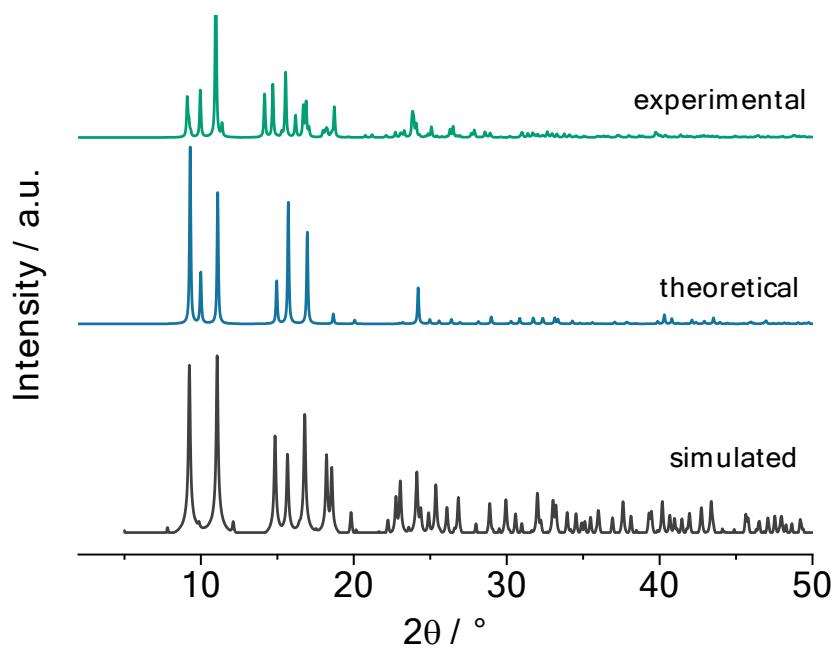

**Figure S2.** Powder X-ray diffraction patterns of **2**: calculated from the simulated structure (black), calculated from the crystal structure (blue), as-made material (green).

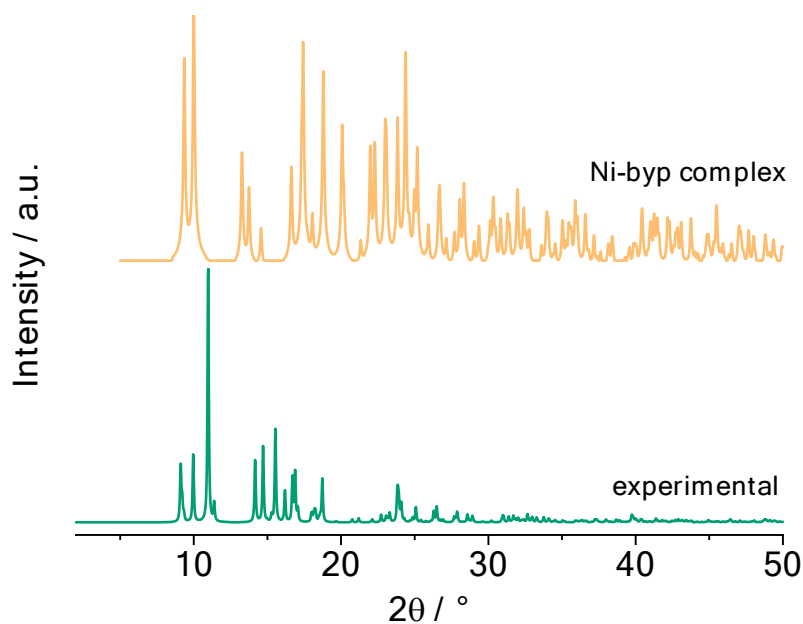

Figure S3. Powder X-ray diffraction patterns of **2** and pre-organized Ni-bipyridine framework  $[(\text{Ni}(\text{bipy})_2(\text{NO}_3)_2)_n]$  (CCDC 182/1136).<sup>10</sup>

### Electrochemistry

Electrochemical measurements were taken on a BASiEpsilonE2P electrochemical analyzer (USA). The program concerned Epsilon-EC-USB-V200 waves. A conventional three-electrode system was used with glassy carbon for carbon paste electrode (CPE) solutions for powder samples as the working electrode, the Ag/AgCl system was served as reference electrode, and a Pt wire as the counter electrode. 0.1 M  $\text{Et}_4\text{NBF}_4$  was used as the supporting electrolyte to determine the current–voltage characteristics. To study the powder samples, a modified CPE working electrode was used, which was prepared as follows: the carbon particles/phosphonium salt (dodecyl(tri-tert-butyl)phosphonium tetrafluoroborate) composite electrode was prepared using a grinding a mixture of graphite powder and phosphonium salt with a 90/10 (w/w) ratio in mortar giving it a homogeneous mass. A modified electrode was also devised in a similar manner except that a portion (ca. 5%) of the graphite powder was replaced by the CPs under study. As a result, a portion of the resulting paste was packed firmly into the (3 mm in diameter) a Teflon holder cavity.<sup>9</sup>

### Energy dispersive spectroscopy (EDS) of **2**.

The chemical composition of Ni coordination polymer was studied using energy dispersive spectroscopy (EDS) in addition to the elemental analysis. The EDS pattern confirms the presence of Ni, Fe, and P in the synthesized compound. Quantitative analyses of the EDS result show, that **2** contains 23.6 wt.% Ni, 39.5 wt.% f Fe and 36.9 wt.% P.

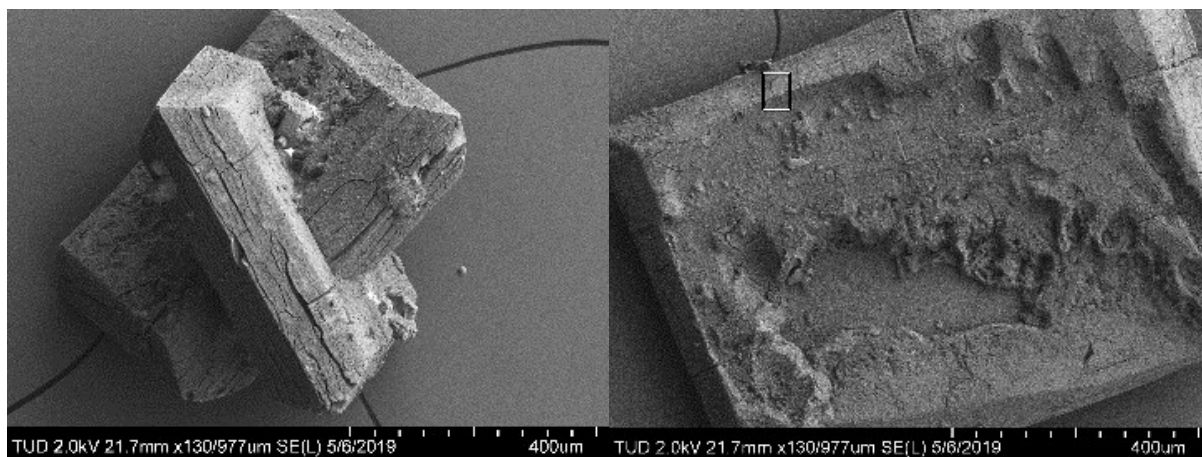

**Figure S4.** SEM image of **2**.

### Thermogravimetry (TGA)

The thermal stability of **2** was investigated by thermogravimetric (TG) analysis using NETZSCH (Selb, Germany) STA449 F3 instrument. Approximately 5–6 mg of sample was placed into an Al<sub>2</sub>O<sub>3</sub> crucible with a pre-hole on the lid and heated from 30 to 1000 °C. The same empty crucible was used as the reference. High-purity argon was used with a gas flow rate of 50 mL min<sup>-1</sup>. TG measurement was performed at the heating rates of 10 °C min<sup>-1</sup>.

Mass change in the range of 25 - 242 °C is due to loss of the solvent (water) molecules. Further mass losses correspond to decomposition of linker molecules – Fc fragment and bpy. The residual mass of 35.75% fits to the mass of products remaining after combustion to Fe<sub>2</sub>O<sub>3</sub>, NiO and P<sub>2</sub>O<sub>5</sub> (found 35.75%, calculated 30.72%).

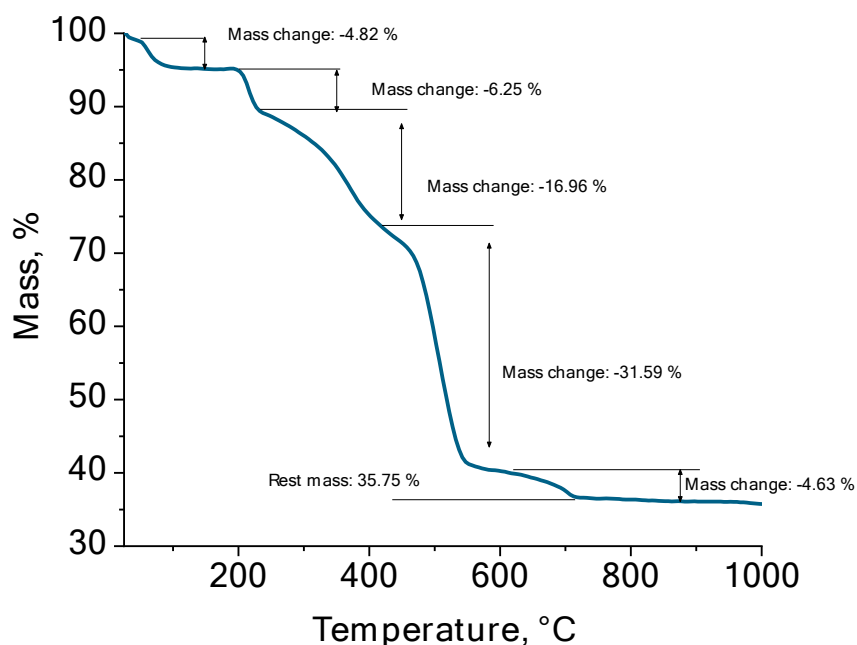

**Figure S5.** Thermogravimetric analysis data of **2**.

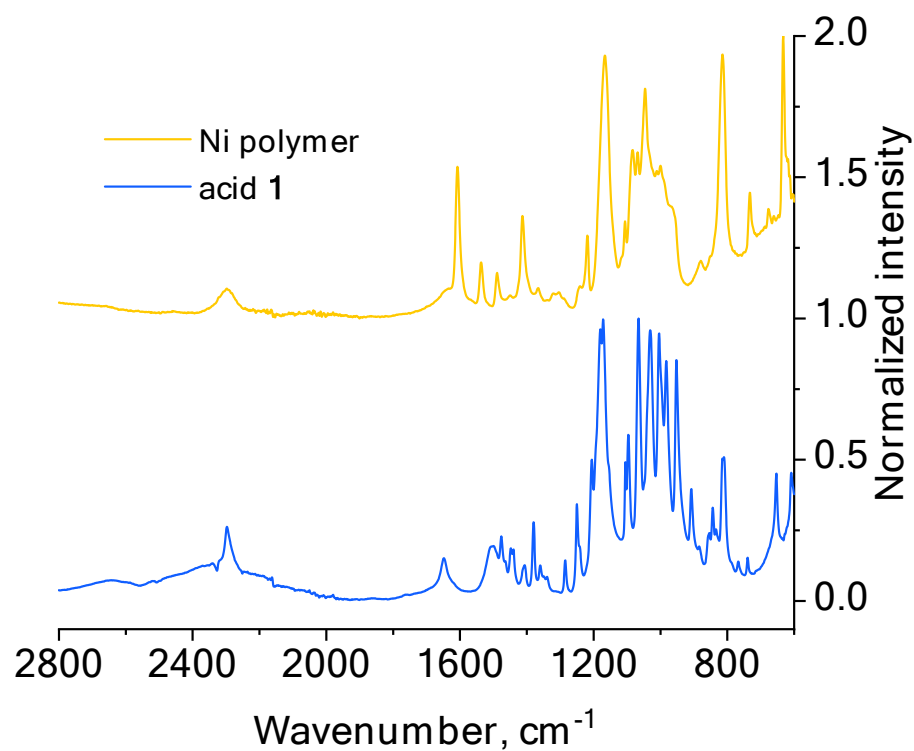

Figure S6. IR spectra for 1 (in blue) and 2 (in orange).

Scanning Electron Microscopy (SEM)

---

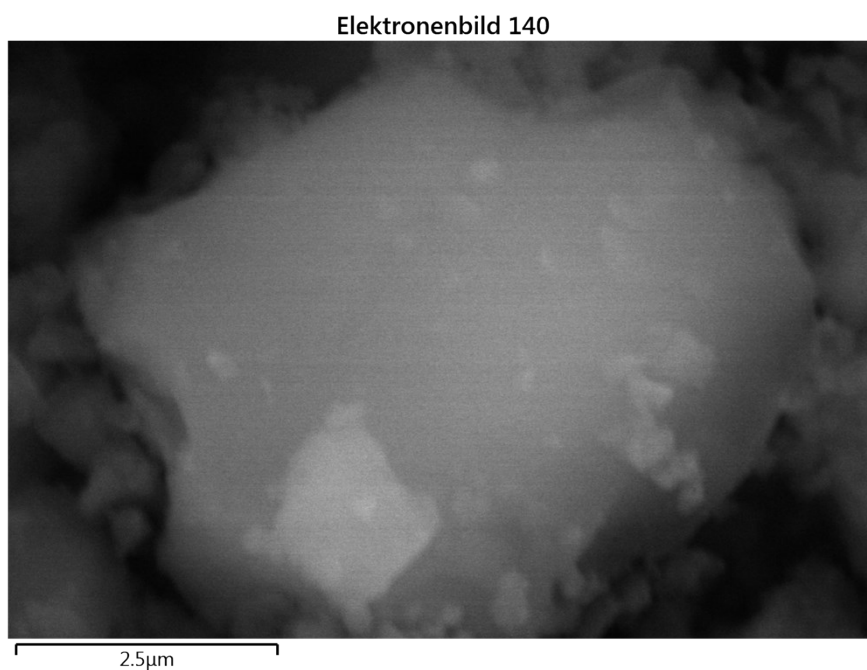

Figure S7. EDS analysis for 2.

---

|                            |                     |
|----------------------------|---------------------|
| Name:                      | Electron image140   |
| Collected:                 | 16.06.2020 11:42:52 |
| Input signal:              | Sig1                |
| Resolution (width):        | 1024 pixels         |
| Resolution (height):       | 704 pixels          |
| Image width:               | 8.33µm              |
| Image height:              | 5.72µm              |
| Table tilt degree:         | 0.00°               |
| Sample tilt in degrees:    | 0.00°               |
| Software tilt correction:  | Not applied         |
| Enlargement:               | 15000 x             |
| Number of frames averaged: | 1                   |
| Dwell time:                | 10µs                |

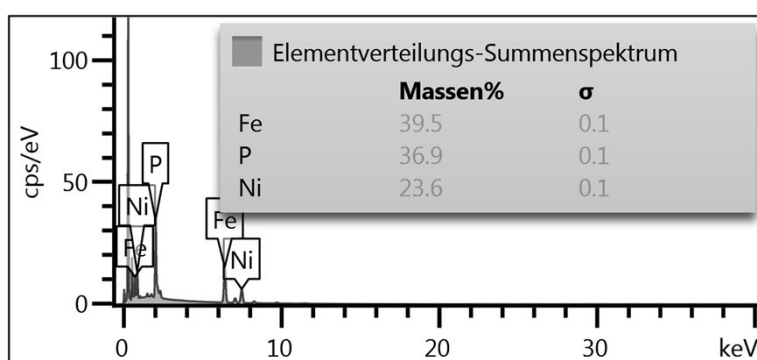

| Element | Line type | Quantification | Area       | Sigma   | Fit index |
|---------|-----------|----------------|------------|---------|-----------|
| P       | K series  | Yes            | 710123.35  | 1788.38 | 430.36    |
| Fe      | K series  | Yes            | 542660.67  | 1279.14 | 4.36      |
| Fe      | L series  | No             | 178889.56  | 1541.72 | 11680.94  |
| Ni      | K series  | Yes            | 226185.07  | 902.70  | 4.27      |
| Ni      | L series  | No             | 233656.29  | 1263.17 | 7193.90   |
| Al      | K series  | No             | 27725.92   | 757.63  | 123.73    |
|         | Noise 1   | No             | 173323.57  | 4095.56 | 10193.55  |
|         | Noise 2   | No             | -210762.85 | 7639.02 | 1879.84   |
|         | Noise 3   | No             | 113081.57  | 3971.10 | 1762.41   |

|                            |                                                 |
|----------------------------|-------------------------------------------------|
| Name:                      | Element distribution sum spectrum               |
| Element list type:         | Current spectrum                                |
| Processing option:         | All elements                                    |
| Coating element:           | No                                              |
| Automatic line selection:  | Activated                                       |
| Normalization:             | Activated                                       |
| Limit value determination: | Disabled                                        |
| Elements to be deployed:   | Al                                              |
| Selected standards:        | Quant Standardizations (Extended Set) [default] |
| Pulse pileup correction:   | Successfully carried out                        |
| Detector file:             | X-Max 8                                         |
| Efficiency:                | File based                                      |

|                                       |                                   |
|---------------------------------------|-----------------------------------|
| <b>General information</b>            |                                   |
| Name                                  | Element distribution sum spectrum |
| Recording date                        | 16.06.2020 11:43:13               |
| <b>Conditions for registration</b>    |                                   |
| Measurement time (seconds)            | 230.7                             |
| Real time (seconds)                   | 426.0                             |
| Process time                          | 5                                 |
| Energy range (keV)                    | 40                                |
| Number of channels                    | 2048                              |
| Energy per channel (eV)               | 20.0                              |
| Acceleration voltage (kV)             | 25.0                              |
| Enlargement                           | 15000.0                           |
| Working distance (mm)                 | 14.8                              |
| Sample tilt (degree)                  | 0.0                               |
| Spectrum information                  |                                   |
| Spectrum range (counts)               | 7554266.0                         |
| Spectrum Count Rate (cps)             | 17732.7                           |
| Pulse pileup correction               | Successfully carried out          |
| <b>Strobe information</b>             |                                   |
| Strobe resolution (eV)                | 44.05                             |
| Strobe area (counts)                  | 5808900.0                         |
| <b>Energy calibration information</b> |                                   |
| Calibration date                      | 05.10.2015 15:36:32               |
| Calibration peak                      | Nickel K-Series                   |
| Gain Calibration (eV / Channel)       | 19.9966                           |
| <b>Beam calibration information</b>   |                                   |
| Calibration date                      | 05.10.2015 15:32:59               |
| Calibration peak                      | Nickel K-Series                   |
| Peak integral (impulses)              | 310238.0                          |
| Process time                          | 5                                 |
| Measurement time (seconds)            | 12.3                              |
| <b>System configuration</b>           |                                   |
| Detector type                         | X-Max                             |
| serial number                         | 65977-X080                        |
| Window type                           | SATW                              |
| Processor type                        | XStream2                          |
| Azimuth (degrees)                     | 0.0                               |
| Inclination (degree)                  | 30.0                              |



EDS-Überlagerungsbild 130

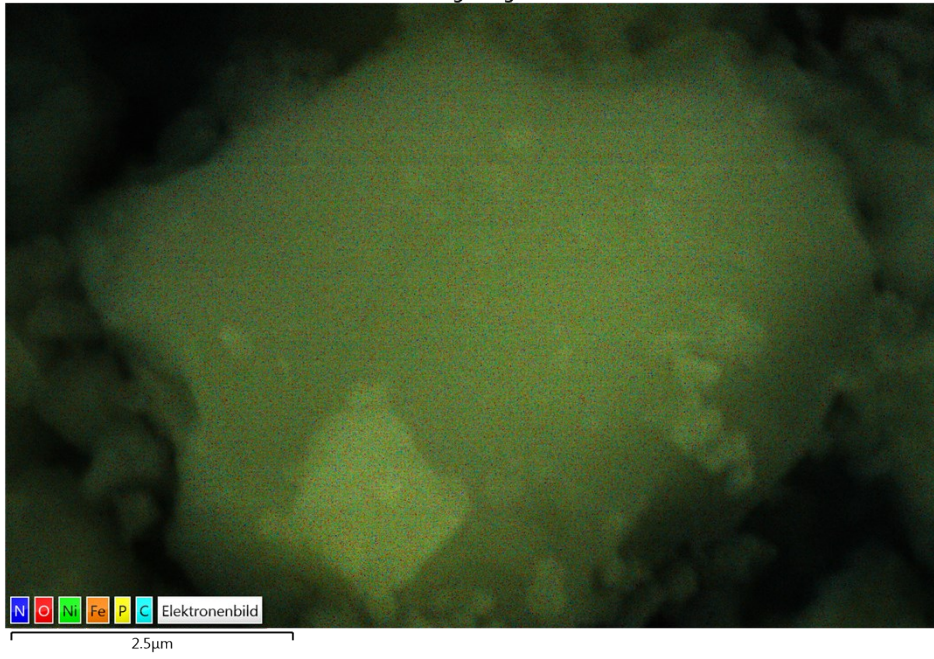

Figure S8. EDS overlay image for 2

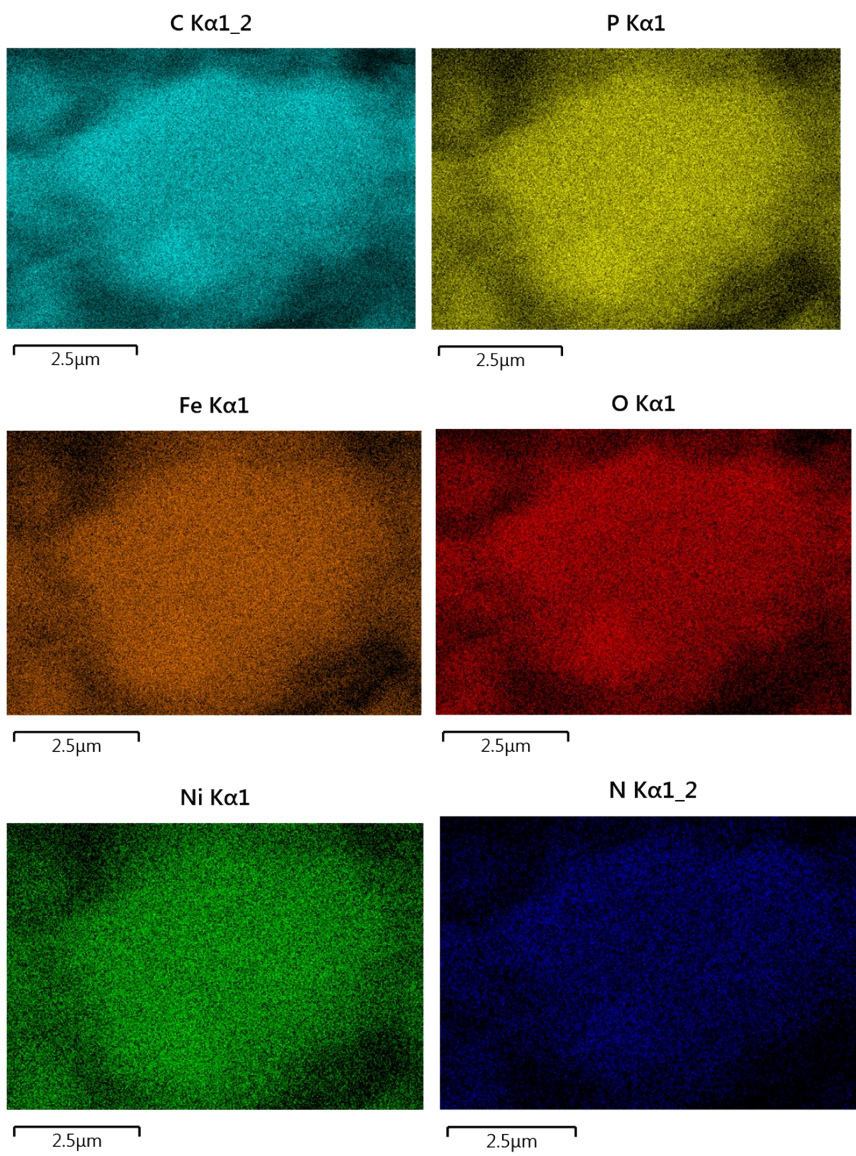

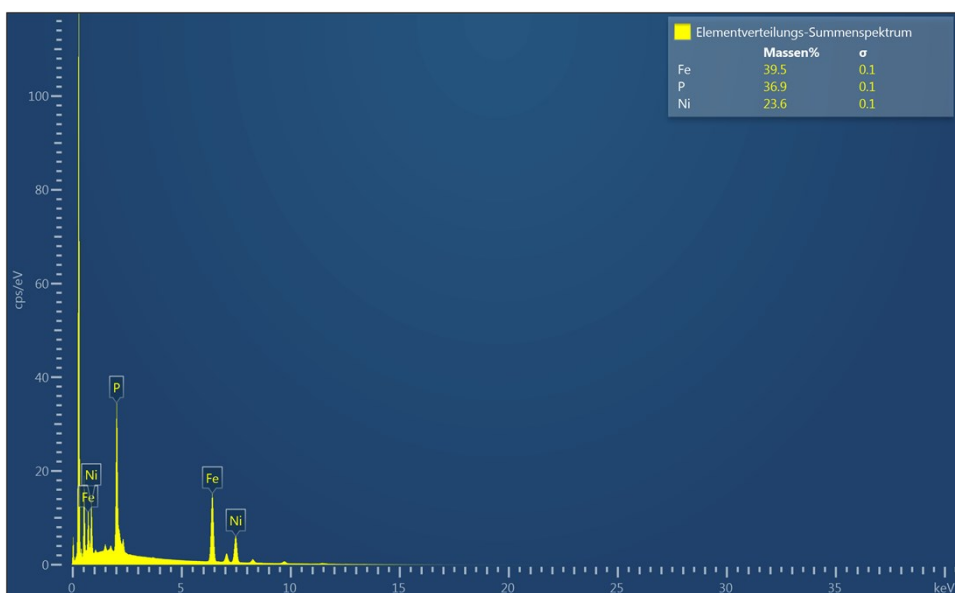

**Fig. S9.** Element distribution sum spectrum and mass %.

## References

- 1 Bruker. APEX3 Crystallography Software Suite, Bruker AXS, Inc., Madison, WI, USA, 2016.
- 2 Bruker. SAINT. Crystallography Software Suite, Bruker AXS, Inc., Madison, WI, USA, 2016.
- 3 L. Krause, R. Herbst-Irmer, G. M. Sheldrick, D. Stalke *J. Appl. Crystallogr.* 2015, **48**, 3–10.
- 4 G. M. Sheldrick, *Acta Crystallogr., Sect. A: Found. Crystallogr.*, 2008, **64**, 112–122.
- 5 A. X. S. Bruker, APEX2-Software Suite for Crystallographic Programs, Bruker AXS, Inc., Madison, WI, USA, 2009.
- 6 Bruker, SMART and SAINT Version 6.0. in Area detector control and integration software, Wisconsin Bruker Analytical X-ray Instruments Inc., Madison, USA, 2003.
- 7 G. M. Sheldrick, SADABS. Program for absorption correction, University of Göttingen, Göttingen, Germany, 1997.
- 8 G. M. Sheldrick, *Acta Crystallogr., Sect. C: Found. Crystallogr.*, 2015, **71**, 3–8.
- 9 M. Khrizanforov, R. Shekurov, V. Miluykov, L. Gilmanova, O. Kataeva, Z. Yamaleeva, T. Gerasimova, V. Ermolaev, A. Gubaidullin, A. Laskin, Y. Budnikova, *Dalton Trans.*, 2019, **48**, 16986–16992.
- 10 C. J. Kepert, M. J. Rosseinsky, *Chem. Commun.*, 1999, 375–376.
